# Supplementary material for: The Substituent Effect on the Radical Scavenging Activity of Apigenin
Source: PubMed Central journal article supplement (PMC6222755; doi:10.3390/molecules23081989), 2018-08-10
Supplement: molecules-23-01989-s001.pdf [file molecules-23-01989-s001.pdf]

# Supplementary materials for:

## The substituent effect on the radical scavenging activity of apigenin

Yan-Zhen Zheng<sup>1,†</sup>, Da-Fu Chen<sup>1,\*†</sup>, Geng Deng<sup>2</sup> and Rui Guo<sup>1</sup>

<sup>1</sup> College of Bee Science, Fujian Agriculture and Forestry University, Fuzhou 350002, P. R. China;  
yanzhenzheng@fafu.edu.cn (Y.Z.Z.); dfchen826@fafu.edu.cn (D.F.C.); rui\_0508@163.com (R.G.)

<sup>2</sup> Key Laboratory of Bioorganic Phosphorous Chemistry and Chemical Biology (Ministry of Education), Department of Chemistry, Tsinghua University, Beijing 100084, P. R. China;  
dengg13@mails.tsinghua.edu.cn (G.D.)

<sup>†</sup> These authors contributed equally to this work

<sup>\*</sup> Correspondence: dfchen826@fafu.edu.cn (D.F.C.); Tel.: +86-0591-8378-9482

12

13

14 **Table S1.** The linear formulas related with the Hammett sigma constants and the BDE/IP/PA. In the  
 15 formulas, y represents the BDE/IP/PA, x represents the Hammett sigma constants

|                          | gas                   | benzene              | water                |
|--------------------------|-----------------------|----------------------|----------------------|
| BDE(4'-OH) vs $\sigma_p$ | $y = 14.5x + 368.5$   | $y = 15.7x + 372.0$  | $y = 18.1x + 367.7$  |
| BDE(5-OH) vs $\sigma_p$  | $y = 7.4x + 431.0$    | $y = 6.7x + 425.4$   | $y = 8.1x + 391.0$   |
| BDE(7-OH) vs $\sigma_m$  | $y = 9.9x + 386.7$    | $y = 13.2x + 390.1$  | $y = 19.9x + 386.5$  |
| IP vs $\sigma_p$         | $y = 86.4x + 774.5$   | $y = 84.3x + 666.6$  | $y = 79.3x + 578.2$  |
| PA(4'-OH) vs $\sigma_p$  | $y = -30.0x + 1355.0$ | $y = -21.4x + 400.4$ | $y = -10.5x + 148.7$ |
| PA(5-OH) vs $\sigma_m$   | $y = -46.4x + 1446.1$ | $y = -38.2x + 470.3$ | $y = -19.0x + 162.4$ |
| PA(7-OH) vs $\sigma_m$   | $y = -46.9x + 1376.2$ | $y = -37.9x + 411.7$ | $y = -15.9x + 140.9$ |

16

17

18

19

20

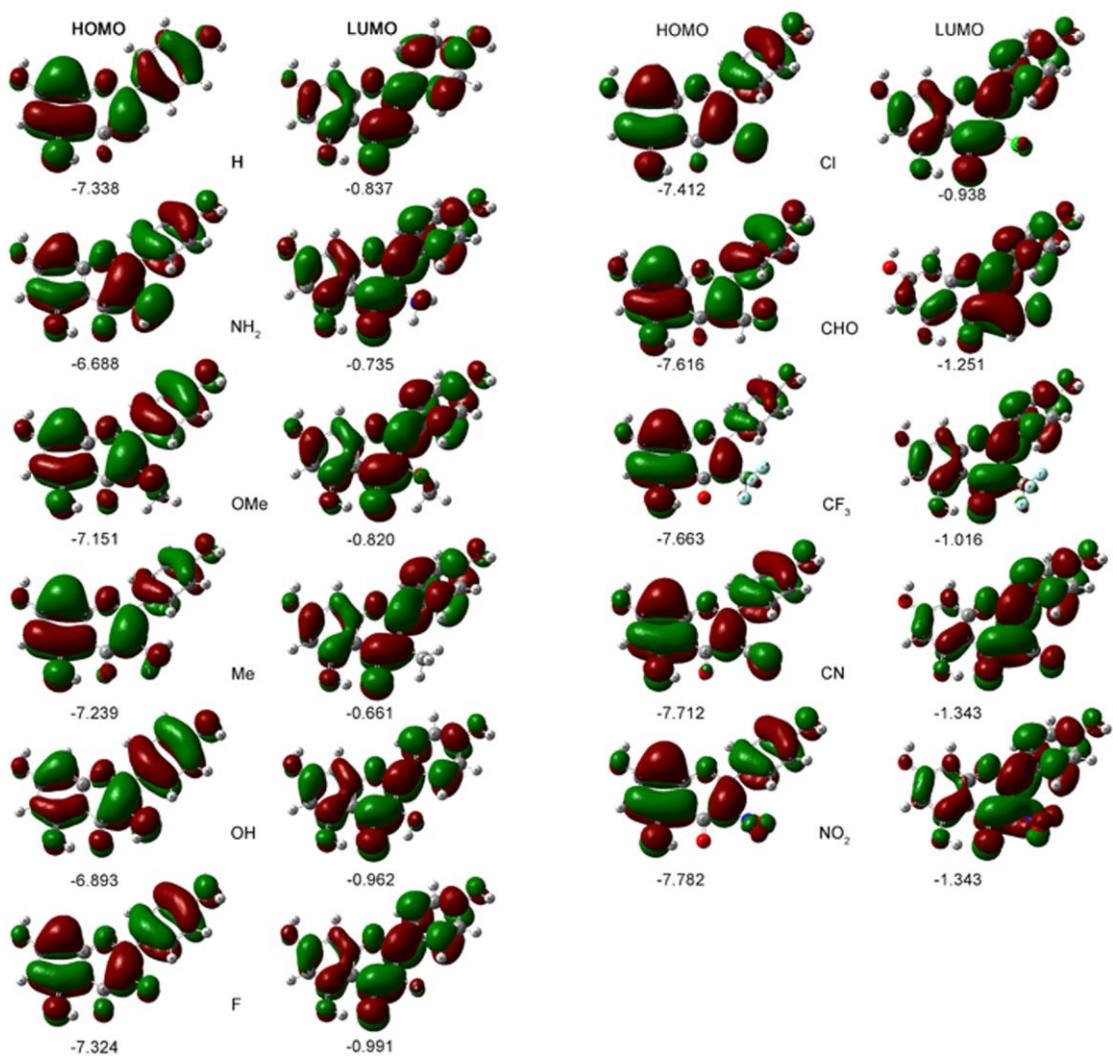

21

22 **Figure S1.** The energies and distributions of HOMO and LUMO orbitals for the investigated  
23 compounds in the gas phase.

24

25

26

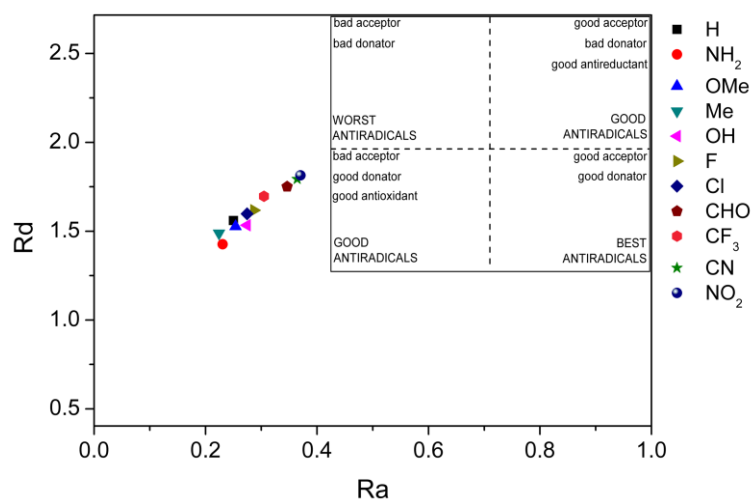

27

28 **Figure S2.** DAM for apigenin and its derivatives. The inset is definition of the four regions in DAM.

29
